# Supplementary material for: Effect of the solvent on improving the recognition properties of surface molecularly imprinted polymers for precise separation of erythromycin
Source: Royal Society of Chemistry journal article supplement (doi:10.1039/c5ra09497f), 2015-01-01
Supplement: c5ra09497f1.pdf [file c5ra09497f1.pdf]

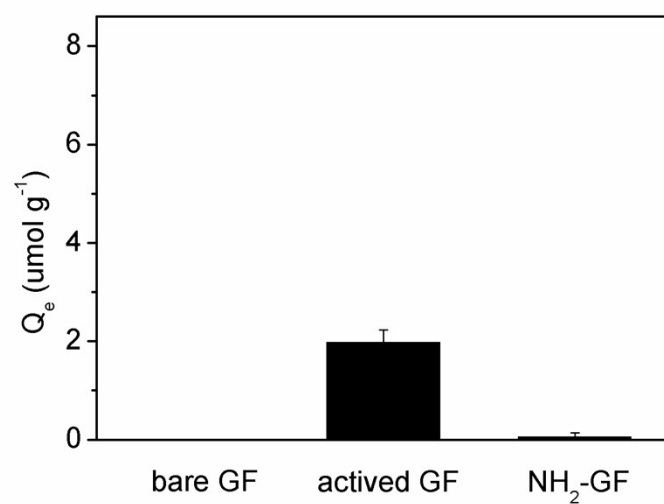

Fig. S1 Adsorption capacities of different GF for ERY. Bare GF: glass fibers without any preprocessing; active GF: glass fibers activated by a hot alkali solution;  $\text{NH}_2$ -GF: amino-modified GF using a silane coupling agent.
